# Supplementary material
Source: Springer Nature journal article supplement (https://www.springermedizin.de/resource/supplementary/12943_2006_193_MOESM3_ESM.pdf/9553646)

**A**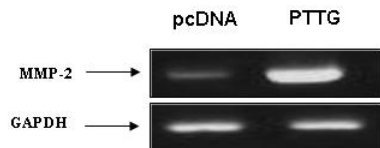**B**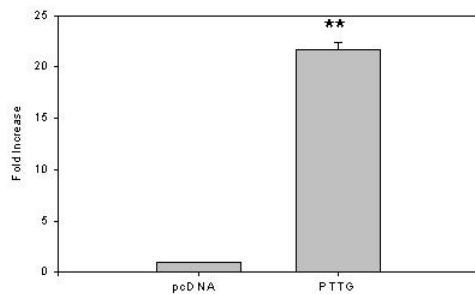**C**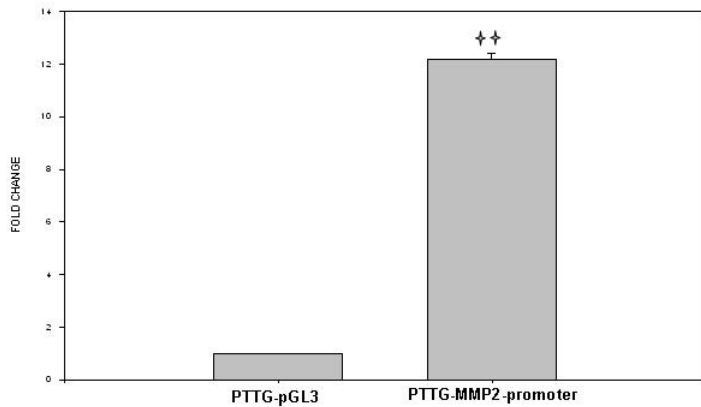

Supplement: MOESM3 [file 9553646]
